# Supplementary material
Source: Springer Nature journal article supplement (https://www.springermedizin.de/resource/supplementary/13063_2013_1501_MOESM3_ESM.pdf/9620184)
Supplement: MOESM3 [file 9620184]

Dear MORE CARE participant, It is important for the health of the child in your care that you see doctor for follow-up. Please remember that you have an appointment on \_\_\_\_\_ at \_\_\_\_\_ in \_\_\_\_\_ with Dr\_\_\_\_\_. The doctor is expecting your visit. Have a nice day.
